# Supplementary material for: Monkeypox Viral Detection In Semen Specimens of Confirmed Cases: A Systematic Review and Meta-Analysis
Source: Research Square preprint supplement (doi:10.21203/rs.3.rs-1970704/v1), 2022-08-18
Supplement: Supplementary file 1 [file 22ded2f9fd486c4f38d6e3df.docx]

**Supplementary Table 1.** The adjusted search terms as per searched electronic databases

| Database | No | Search Query | Results |
| --- | --- | --- | --- |
| PubMed | | | |
|  | #1 | Monkeypox virus OR MPXV OR “monkey pox” OR "Monkeypox"[Mesh] OR "Monkeypox virus"[Mesh] | 911 |
| #2 | Semen* OR seminal OR "Semen Analysis"[Mesh] OR "Semen"[Mesh] | 96,202 |
| #3 | #1 AND #2 | 2 |
| Scopus | | | |
|  | #1 | ( TITLE-ABS-KEY ( monkeypox ) OR TITLE-ABS-KEY ( mpxv ) OR TITLE-ABS-KEY ( monkey AND pox ) OR TITLE-ABS-KEY ( monkeypox AND virus ) ) | 1,311 |
| #2 | ( TITLE-ABS-KEY ( semen* ) OR TITLE-ABS-KEY ( seminal ) OR TITLE-ABS-KEY ( semen AND analysis ) ) | 123,120 |
| #3 | #1 AND #2 | 1 |
| EMBASE | | | |
|  | #1 | mpxv:ti,ab,kw OR 'monkey pox':ti,ab,kw OR monkeypox:ti,ab,kw | 1,085 |
|  | #2 | monkeypox virus'/exp OR 'monkeypox'/exp | 1,023 |
|  | #3 | #1 OR #2 | 1,334 |
|  | #4 | semen:ti,ab,kw OR seminal:ti,ab,kw OR 'semen analysis':ti,ab,kw | 79,594 |
|  | #5 | sperm'/exp OR 'semen parameters'/exp OR 'semen analysis'/exp | 122,452 |
|  | #6 | #4 OR #5 | 155,734 |
|  | #7 | #3 AND #6 | 1 |
| Web of Science | | | |
|  | #1 | Monkeypox virus (All Fields) or MPXV (All Fields) or monkey pox (All Fields) or Monkeypox (All Fields) | 1,194 |
| #2 | Semen (All Fields) or seminal (All Fields) or Semen Analysis (All Fields) | 91,923 |
| #3 | #1 AND #2 | 1 |
| ProQuest | | | |
|  | #1 | (monkeypox OR "monkey pox") AND (semen OR seminal) | 259 |
| ScienceDirect | | | |
|  | #1 | Monkeypox virus OR MPXV OR “monkey pox” OR "Monkeypox" OR "Monkeypox virus" | 2,186 |
| #2 | Semen OR seminal OR "Semen Analysis" | 282,079 |
| #3 | #1 AND #2 | 156 |
| EBSCOHost-Academic Search Complete | | | |
|  | #1 | TX monkeypox OR TX "monkey pox" | 1,573 |
| #2 | TX semen* OR TX seminal | 257,668 |
| #3 | #1 AND #2 | 53 |
| Google Scholar | | | |
|  | With all of the words | Monkeypox |  |
| with at least one of the words | Semen seminal |  |
| Final |  | 100 |
